# Supplementary figures and images for: Synchronized amplification of local information transmission by peripheral retinal input
Source: eLife journal article supplement (doi:10.7554/elife.09266), 2015-11-14

Figure 7 - supplemental Fig 2

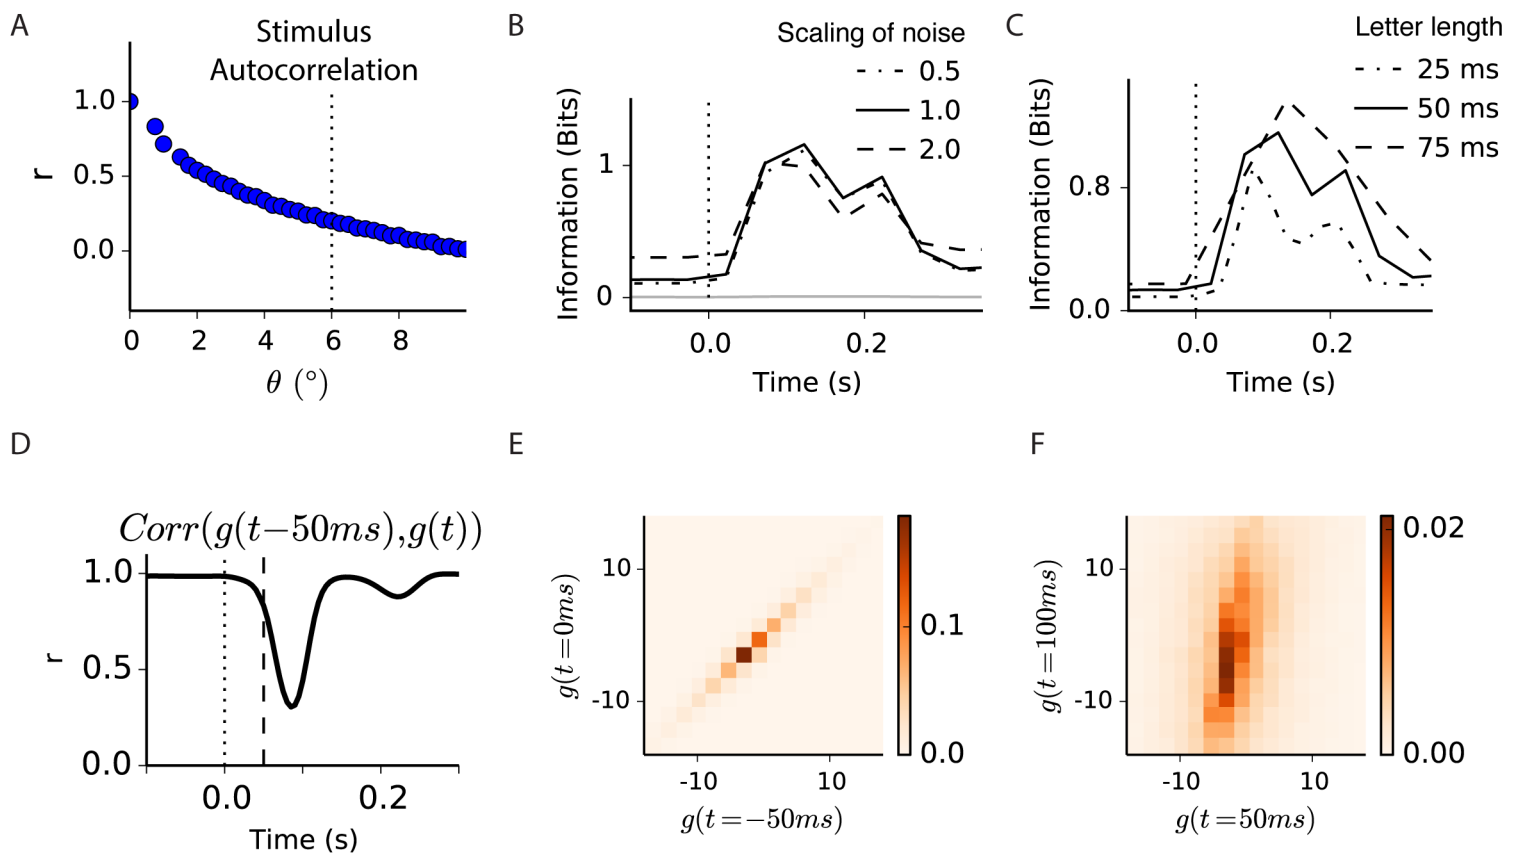

Supplement: supp [file elife-09266-supp-v1.zip]
